# Supplementary material for: Renewable gasoline-range aromatics and hydrogen-enriched fuel gas from biomass via catalytic microwave-induced pyrolysis
Source: Royal Society of Chemistry journal article supplement (doi:10.1039/c5gc00516g), 2015-01-01
Supplement: c5gc00516g1.pdf [file c5gc00516g1.pdf]

Supplementary information:

**Fig. S1** The schematic diagram of the microwave-assisted pyrolysis system integrated with catalysis process

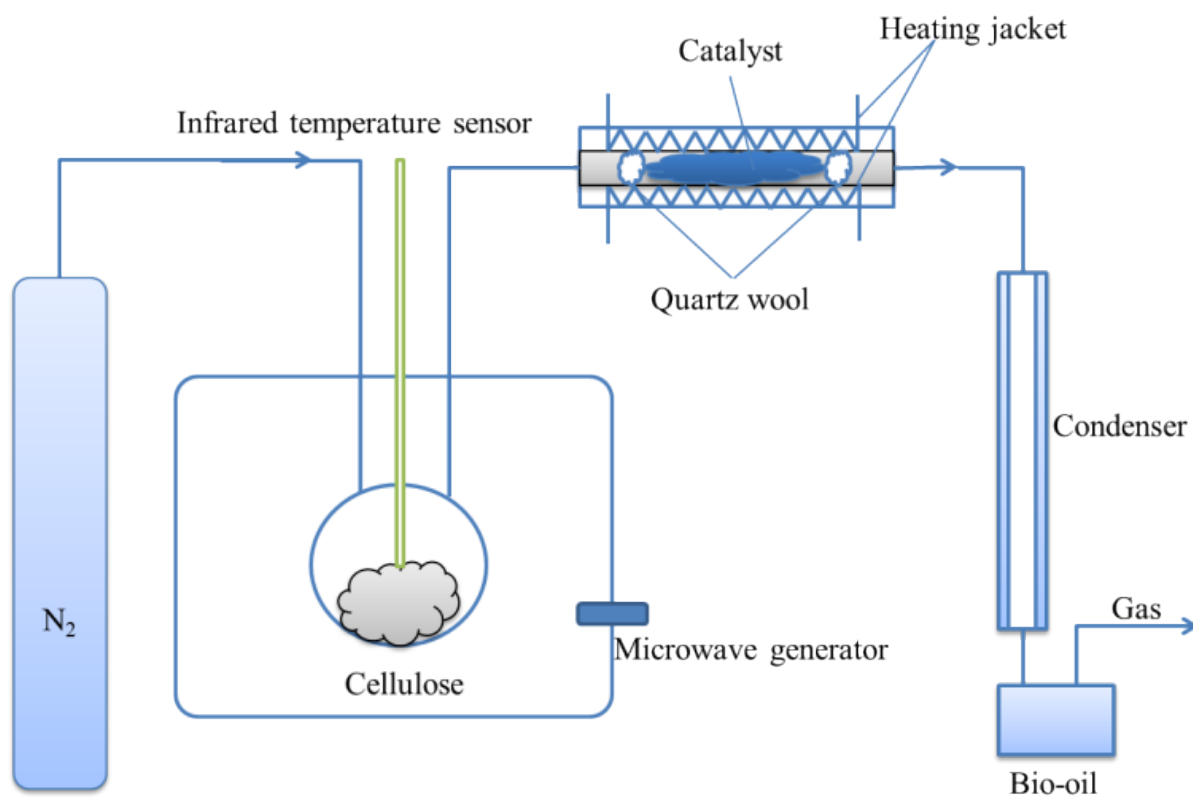

**Fig. S2** NH<sub>3</sub>-TPD profiles of ZSM-5 upon various treatments (the serial numbers correspond to those in Table 2).

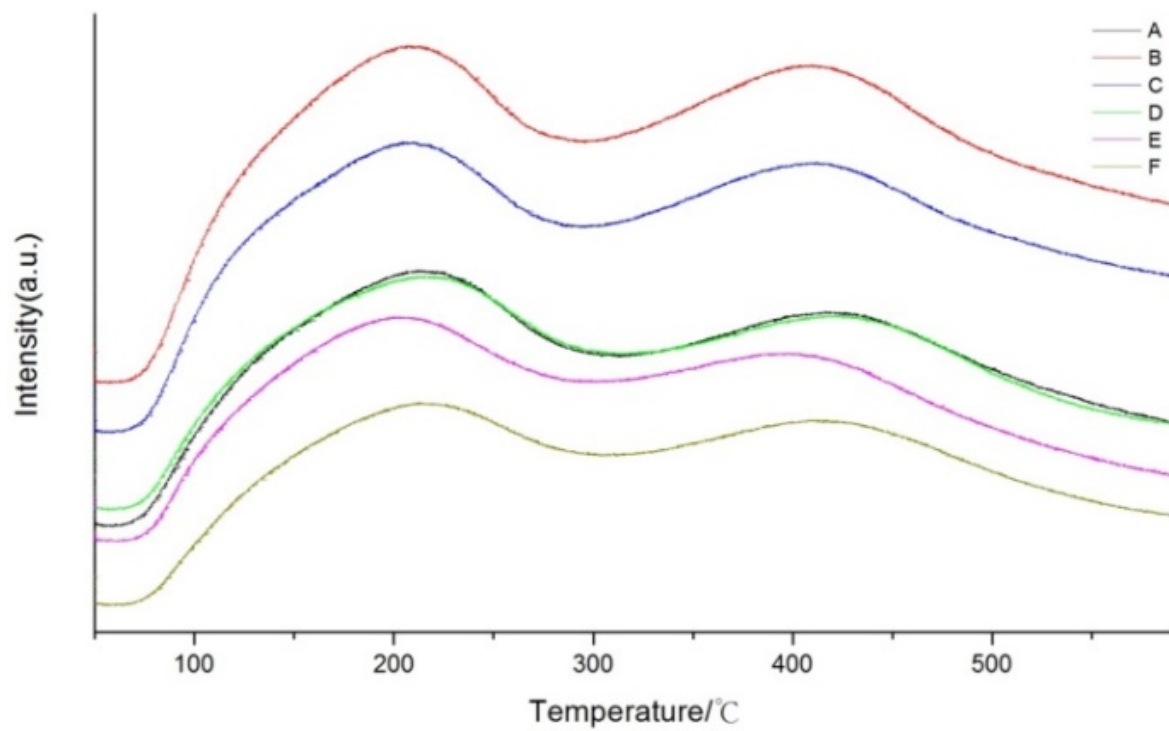

**Fig. S3** The selectivity of chemical compounds in bio-oils over fresh catalyst versus spent catalyst (catalytic temperature: 500 °C; WHSV<sup>-1</sup>: 0.067 h).

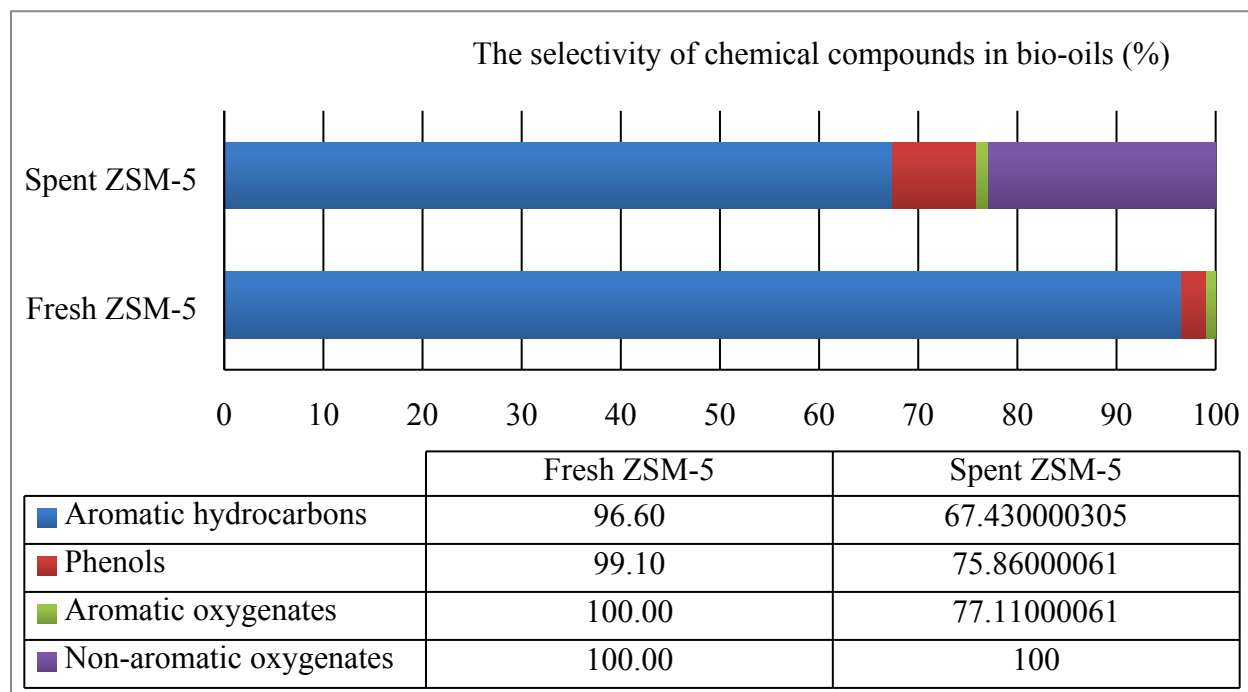

**Fig. S4** The generation of mono-ring aromatic hydrocarbons in ZSM-5 framework: the catalyst consists of a local area of zeolite framework with at least one Brønsted acid site and an organic co-catalyst.

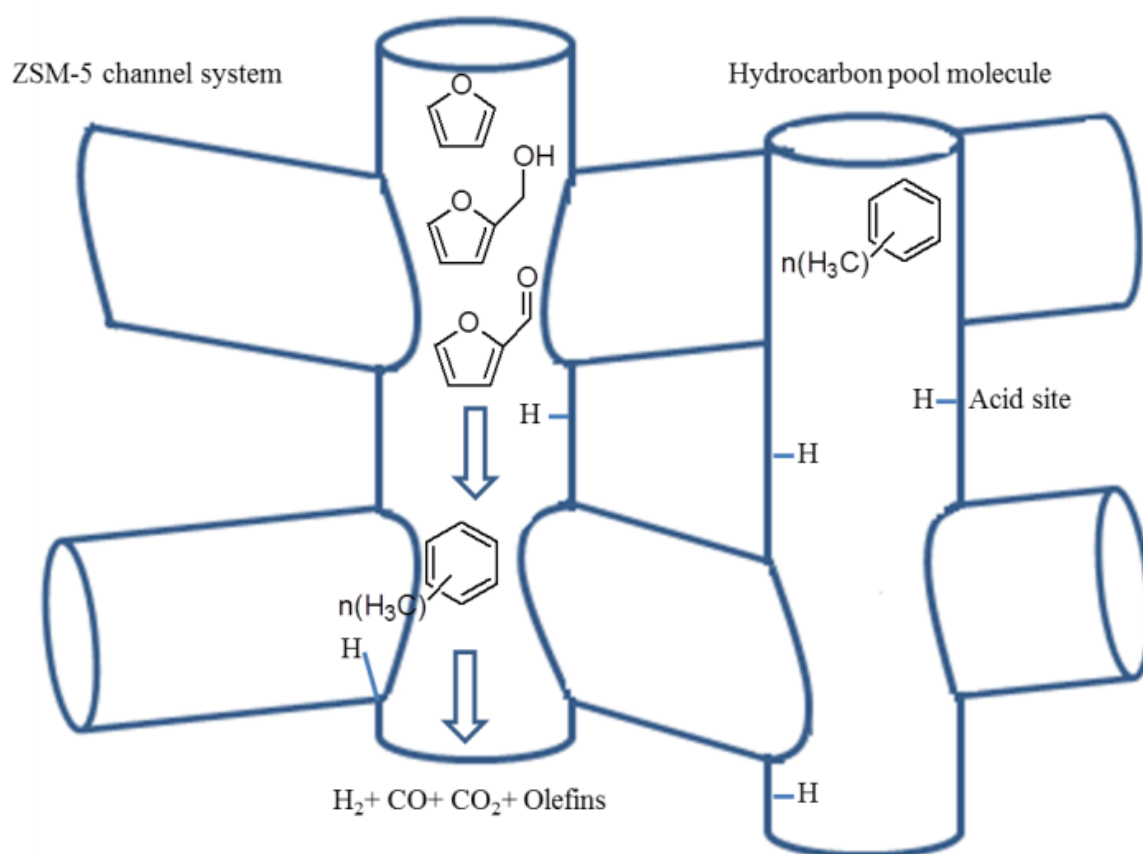

**Table S1** The carbon yield of aromatic hydrocarbons as a function of catalytic temperature at WHSV<sup>-1</sup> of 0.067 h

|                             | Catalytic temperature (°C) |       |       |       |
|-----------------------------|----------------------------|-------|-------|-------|
|                             | 269                        | 375   | 481   | 500   |
| <i>Overall yield/ C (%)</i> |                            |       |       |       |
| Gas                         | 41.24                      | 41.21 | 44.64 | 44.41 |
| Coke                        | 6.77                       | 3.60  | 2.05  | 1.53  |
| Char                        | 30.54                      | 31.26 | 29.92 | 29.62 |
| Aromatics <sup>a</sup>      | 21.45                      | 23.93 | 23.39 | 24.44 |
| <sup>a</sup> by difference  |                            |       |       |       |

**Table S2** Oxygen balance of oxygenated products from catalytic pyrolysis of cellulose at the same WHSV<sup>-1</sup> of 0.067 h

|                             | Catalytic temperature (°C) |       |       |       |
|-----------------------------|----------------------------|-------|-------|-------|
|                             | 269                        | 375   | 481   | 500   |
| <i>Overall yield/ O (%)</i> |                            |       |       |       |
| CO                          | 5.56                       | 6.01  | 6.36  | 5.87  |
| CO <sub>2</sub>             | 44.28                      | 50.96 | 54.78 | 56.26 |
| H <sub>2</sub> O            | 23.84                      | 19.88 | 28.87 | 30.32 |
| Coke                        | 0.76                       | 0.65  | 0.02  | 0.01  |
| Char                        | 4.76                       | 4.80  | 4.66  | 4.70  |
| Total                       | 79.20                      | 82.30 | 94.49 | 97.16 |
|                             |                            |       |       |       |
